# Supplementary material for: Chitosan Hydrogel-Delivered ABE8e Corrects PAX9 Mutant in Dental Pulp Stem Cells
Source: MDPI journal article supplement (doi:10.3390/gels9060436), 2023-05-25
Supplement: s1 [file s1]

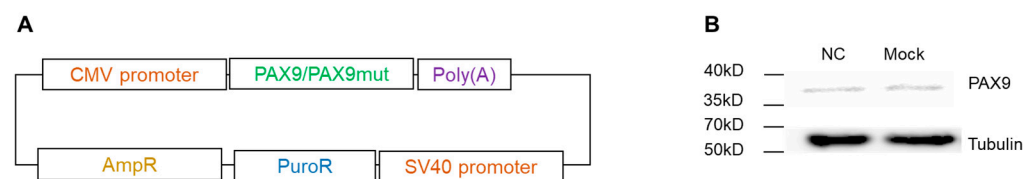

**Scheme S1.** (A) Schematic diagram of PAX9 or PAX9mut expression vector: (B) Western blotting assays for evaluating the expression of PAX9 in DPSCs. NC: DPSCs without treatment. Mock: mock vectors delivered to DPSCs using hydrogel.
